# Supplementary material for: Benign Mucosal Membrane Pemphigoid as a Differential Diagnosis of Necrotizing Periodontal Disease
Source: Hindawi journal article supplement (doi:10.1155/2020/8885158), 2020-01-01
Supplement: f1 [file 8885158.f1.pdf]

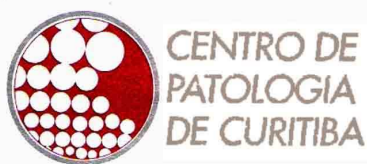

Dr. Luiz Fernando Bleggi Torres CRM 7287  
 Dra. Elizabeth Schneider Gugelmin CRM 7828  
 Dr. Luiz Martins Collaço CRM 8402  
 Dra. Lúcia de Noronha CRM 14547  
 Dra. Ana Paula Martins Sebastião CRM 15282  
 Dra. Ana Cristina Lira Sobral CRM 19283

Unidade : Serviço de Patologia - Hospital das Nações

Exame nº **15/B00471**

Nome : **Elizabete Alves Nedbayluk**

Idade : **50a1m**

Origem : **(E)**

Complem. :

Requis. : **Dr. Lucimari Teixeira**

Data : **15/05/2015**

CRM : **23053**

Prontuario :

Conv. : **Sinam**

Matríc. : **c-12972**

### **Procedimento(s):**

**Boca:**

*Peça Convencional Simples*

4.06.01.20.0 x 1

### **Relatório Médico:**

#### **Resumo Clínico:**

Paciente com hipótese diagnóstica pênfigo bolhoso.

#### **Macroscopia:**

Data: 15/05/2015

Material: ressecção lesão em gengiva.

Um fragmento irregular de tecido rotulado como de gengiva, medindo 0,7x0,2x0,1cm. Coloração creme, aspecto liso e brilhante, consistência macia e elástica. 1/4 TI.

#### **Microscopia:**

Data: 02/06/2015

Cortes histológicos corados por hematoxilina-eosina demonstram fragmentos teciduais com características arquiteturais e celulares que corroboram o diagnóstico a seguir:

#### **Conclusão:**

Data: 02/06/2015

QUADRO HISTOPATOLÓGICO REPRESENTADO POR TECIDO SUBMUCOSO COM DESTELHAMENTO DA LESÃO BOLOHOSA QUE É SUBEPITELIAL. O PROCESSO INFLAMATÓRIO SUBEPITELIAL É ESCASSO. O QUADRO HISTOPATOLÓGICO PODE SER COMPATÍVEL COM BOLHOSE SUBEPITELIAL TIPO PENFIGOIDE BOLHOSO. RECOMENDAMOS CORRELAÇÃO CLÍNICA.

Curitiba, 02/06/2015

**Dra. Lúcia de Noronha**  
**CRM: 14547**
